# Supplementary material for: Technical note: An assessment of the relative contribution of the Soret effect to open water evaporation
Source: Copernicus journal article supplement (doi:10.5194/egusphere-2024-2023), 2024-08-09
Supplement: Supplementary file [file egusphere-2024-2023-RC7-supplement.pdf]

## Reply to Demetris Koutsoyiannis

I agree with the assertion regarding the benefits of signing reviewer comments, and applaud the attitude of getting involved with the outlook of a student. I want to think that I use the same outlook, although I am aware that my writing can sometimes be taken as overly authoritative and even offensive to some readers. I assure that it is not my intent to offend, but rather to learn the truth, and to defend the truth when I believe that I have found it.

With that in mind, I cannot agree with Professor Koutsoyiannis in his assertion that “the mass description is precisely equivalent to the molar description”, because I believe his derivation contains two incorrect assumptions. If I follow correctly the Appendix, just prior to the word “Hence”, Professor Koutsoyiannis’s version of Fick’s law could be written, via substitution, as:

$$J = -D \frac{d}{dz} \left[ \frac{m_v}{m_{TOT}} x \rho \right]$$

So that simplification to the version just following the word “Hence” requires two invalid assumptions:

1. that  $m_{TOT}$  is constant (and so can be extracted from the derivative), but molar mass varies with humidity and so  $\frac{d}{dz} [m_{TOT}] \neq 0$ ; and
2. that  $\rho$  is constant (and so can be extracted from the derivative), but  $\rho$  varies according to various factors\*, principally the temperature ( $T$ ), and so  $\frac{d\rho}{dz} \neq 0$ .  
Given that the issue at hand is the role of  $T$  gradients in modifying Fickian diffusion, or Soret effect, such an assumption is particularly inappropriate.

It is my contention, based on applying Newton’s laws to the mixing *and inertia* of fluids with different molar masses, that the correct version of Fick’s law must be

$$J = -\rho D \frac{df_v}{dz}$$

where  $f_v$  is the mass fraction, also known as the specific humidity ( $q$ ).

\*The other factors influencing gradients in  $\rho$  are the pressure (via the ideal gas law) and the humidity.
